# Supplementary material for: Role of Sn/ZSM-5 in direct syngas conversion
Source: Royal Society of Chemistry journal article supplement (doi:10.1039/d2cy00647b), 2022-01-01
Supplement: d2cy00647b1.pdf [file d2cy00647b1.pdf]

Supporting Information

## **Role of Sn/ZSM-5 in direct syngas conversion**

Yuxiang Chen,<sup>ab</sup> Feng Jiao,<sup>\*ab</sup> Xiulian Pan<sup>\*ab</sup> and Xinhe Bao<sup>a</sup>

<sup>a</sup> State Key Laboratory of Catalysis, National Laboratory for Clean Energy, 2011-Collaborative Innovation Center of Chemistry for Energy Materials, Dalian Institute of Chemical Physics, Chinese Academy of Sciences 457 Zhongshan Road, Dalian 116023 (China)

<sup>b</sup> University of Chinese Academy of Sciences Beijing 100049 (China).

\*E-mail: jiaofeng@dicp.ac.cn, panxl@dicp.ac.cn.

## 1. Figures.

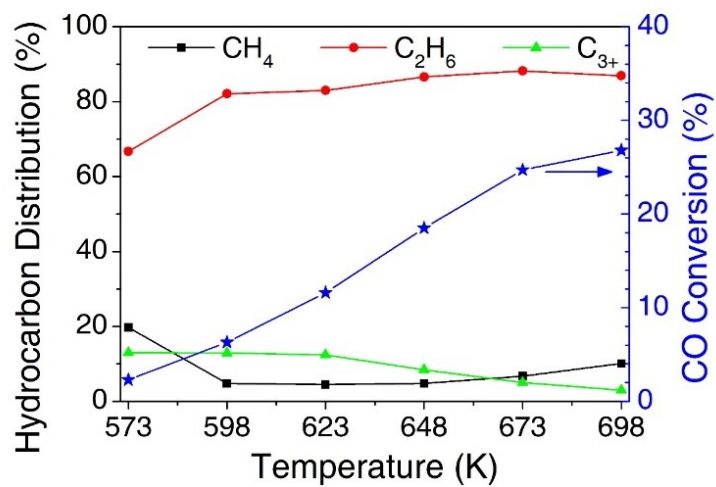

**Figure S1** Catalytic performance of Sn<sub>1.02</sub>/ZSM-5 under different temperature. Reaction condition: H<sub>2</sub>:CO = 2.5, 4.0 MPa, 1500 mL/(g<sub>cat</sub>·h).

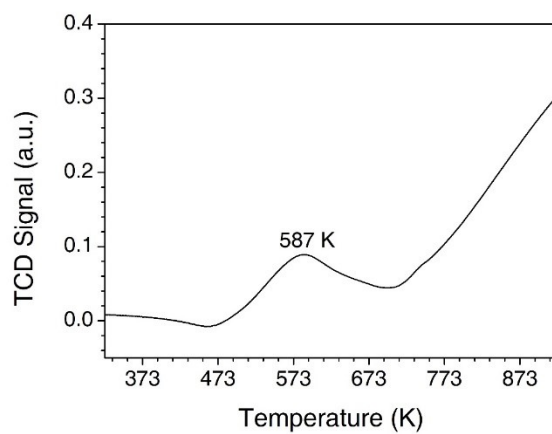

**Figure S2** Temperature programmed reduction of SnO<sub>2</sub> in hydrogen.

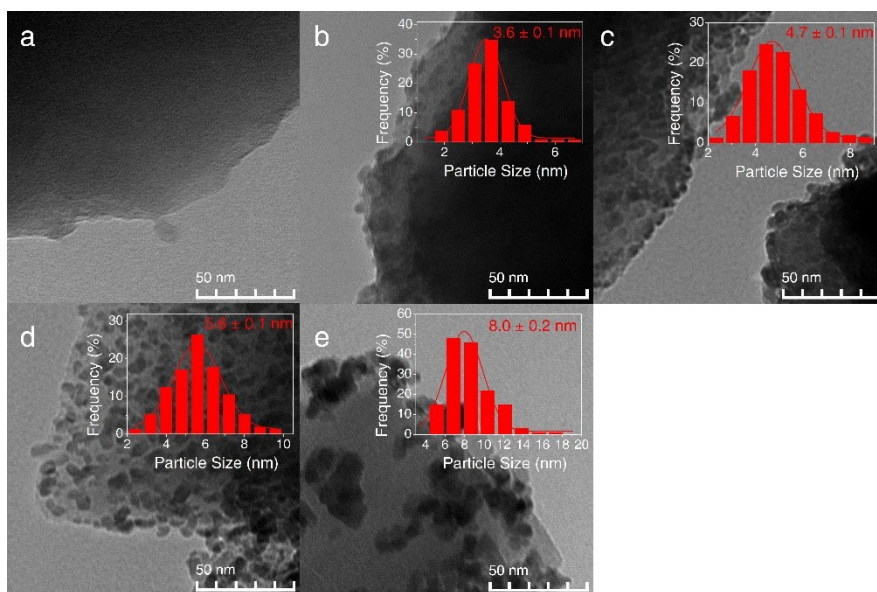

**Figure S3** TEM results of  $\text{Sn}_x/\text{ZSM-5}$  with different Sn loading. (a) ZSM-5; (b)  $\text{Sn}_{0.04}/\text{ZSM-5}$ ; (c)  $\text{Sn}_{0.17}/\text{ZSM-5}$ ; (d)  $\text{Sn}_{0.29}/\text{ZSM-5}$ ; (e)  $\text{Sn}_{1.02}/\text{ZSM-5}$ .

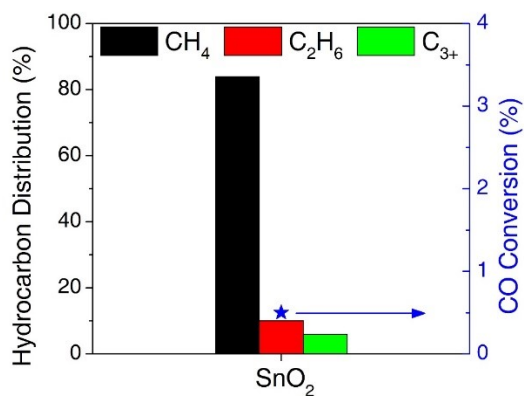

**Figure S4** Catalytic performance of  $\text{SnO}_2$  (10 nm) in direct syngas conversion. Reaction condition: 673 K, 4.0 MPa,  $\text{H}_2/\text{CO} = 2.5/1$ , 1500 mL/(g<sub>cat</sub>·h).

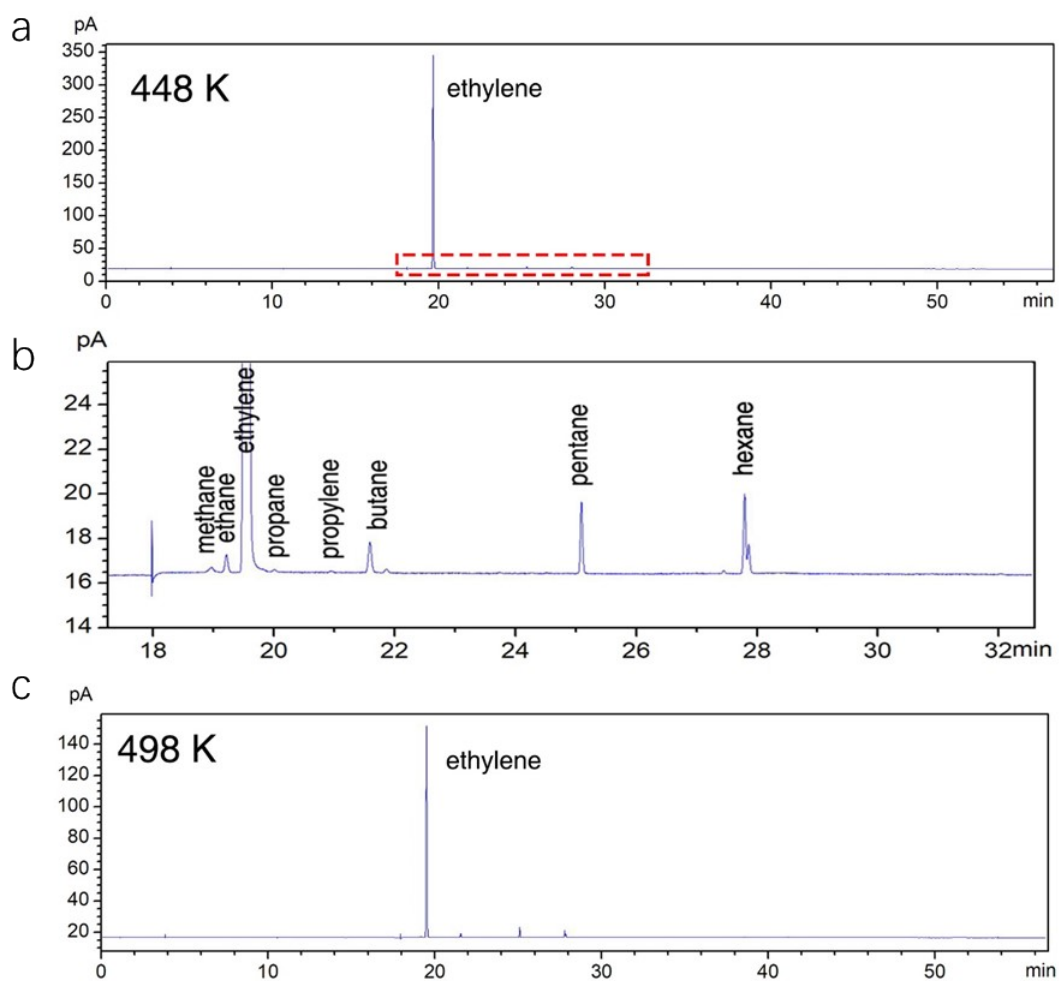

**Figure S5** Gas chromatography monitoring the reaction of 4.0 MPa syngas-treated  $\text{Sn}_{0.29}/\text{ZSM-5}$  in  $\text{H}_2$  at different temperatures. (a) 448 K; (b) Enlarged profile of the marked red region of figure a; (c) 498 K.
